# Supplementary material for: Efficient gold recovery by a thiazolyl covalent organic framework
Source: Royal Society of Chemistry journal article supplement (doi:10.1039/d4cc01391c), 2024-01-01
Supplement: d4cc01391c1.pdf [file d4cc01391c1.pdf]

## Efficient gold recovery by a thiazolyl covalent organic framework

Zhecheng Huang,<sup>a</sup> Liecheng Guo,<sup>a</sup> Kai Yu,<sup>a</sup> Feng Gao,<sup>a</sup> Yuting Yang,<sup>b\*</sup> Feng Luo<sup>a\*</sup>

School of Chemistry and Material Science, East China University of Technology,  
Nanchang, Jiangxi 344000, China

## EXPERIMENTS

**Materials and general methods.** All the organic monomers and ligand were purchased from Jilin Chinese Academy of Sciences -Yanshen Technology Co., Ltd. Others were purchased from Adamas Reagent, Ltd. and used as received without further purification. X-ray powder diffraction was collected by a Bruker AXSD8 Discover powder diffractometer at 40 kV, 40 mA for Cu K $\lambda$  ( $\lambda$ = 1.5406 Å). The simulated powder patterns were calculated by Mercury 1.4. Infrared Spectra (IR) were measured by a Bruker VERTEX70 spectrometer in the 500-4000 cm<sup>-1</sup> region. The gas adsorption isotherms were collected on a Belsorp-max. Ultrahigh-purity-grade (>99.999%) N<sub>2</sub> gases were used during the adsorption measurement. SEM and EDS measurements were carried out using a Hitachi S-4800 microscope. The analyses of concentrations of metal ions in the solution was carried out by ThermoFisher iCap7600 ICP-OES instruments. X-ray photoelectron spectra (XPS) were collected by Thermo Scientific ESCALAB 250 Xi spectrometer. Solid-state NMR experiments were performed on Varian Infinityplus 300 solid-state NMR spectrometer (300 MHz).

**Synthesis of ECUT-COF-29.** Bdta (0.1 mmol, 60 mg), Tdm (0.2mmol, 24 mg) ,2 mL DMF were weighed into a Pyrex tube. Then the tube was placed in a 120 °C for 3 days. After cooling to room temperature, the precipitated was washed with a large amount of DMF and then methanol. The resulting powder was collected by filtration and dried at 80°C under vacuum overnight to obtain a red powder.

**Photocatalytic reduction of gold (III).** Au(III) solution was prepared by dissolving Sodium chloroaurate (NaAuCl<sub>4</sub>, analytical reagent) in deionized water. Visible light was perpendicularly irradiated on the reaction vessel from a 350W Xe lamp with  $\lambda$ >400 nm.

In kinetics experiments, the Au solution with initial concentration of 100 ppm was used. The dose of adsorbent is 5 mg, while the Au solution is 50 ml. In addition, add 5 ml methanol solution and light for 2 h.

In the maximum adsorption capacity experiment, Au solutions with initial concentrations of 100 ppm, 200 ppm, 300 ppm, 400 ppm, and 500 ppm were used. The dose of the adsorbent is 5 mg, while the dose of the Au solution is 50 ml. In

addition, 5 ml of methanol solution is added, and light for 1 h.

In selective adsorption experiments, a 6-ions mixed solution contains both Au and other 5 metal ions with respectively initial concentration of 10 ppm were used. The dose of adsorbent is 5 mg, while the solution is 50 ml. In addition, add 5ml methanol solution and light for 1 h.

The adsorption amount,  $Q_e$  (mg/g), was calculated by the difference of the Au(III) equilibrium concentration before and after adsorption (see equation 1):

$$Q_e = \frac{(C_0 - C_e) \times V}{m} \quad (1)$$

where  $C_0$  (mg/L) and  $C_e$  (mg/L) are the initial concentration and equilibrium concentration of Au in the solutions, respectively;  $V$  (L) is the volume of testing solution and  $m$  (g) is the amount of sorbent.

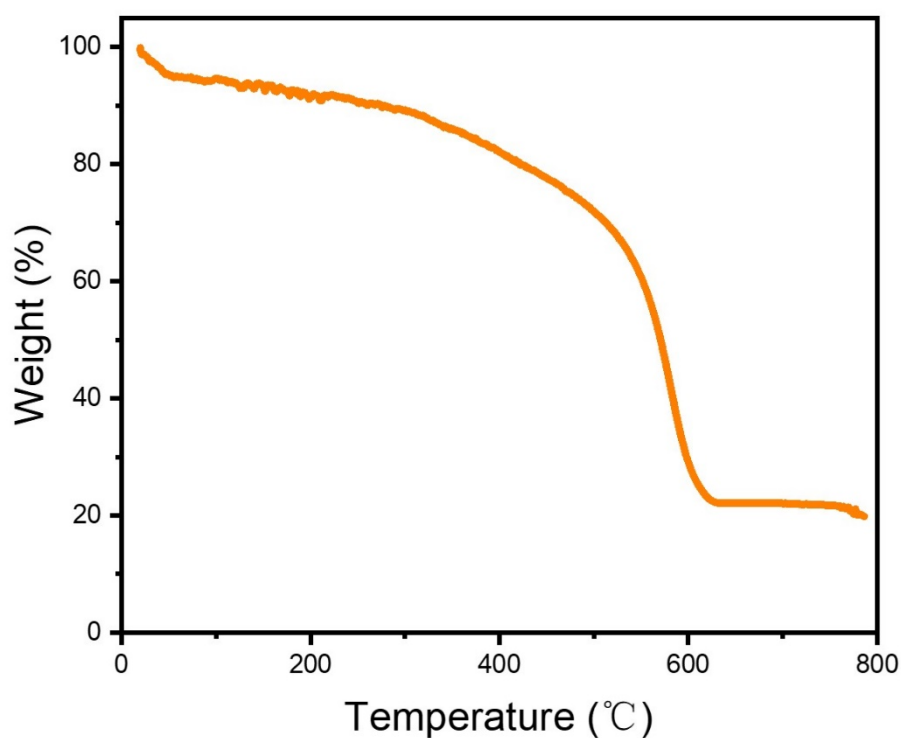

**Fig. S1** TGA curve of ECUT-COF-29.

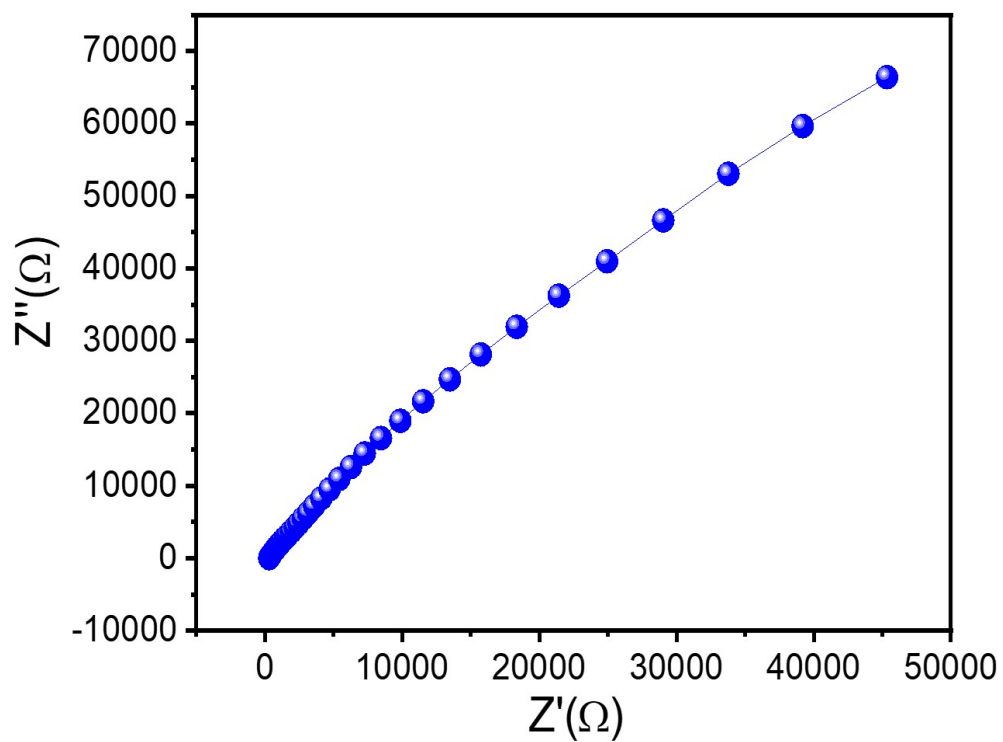

**Fig. S2** EIS Nyquist plots of ECUT-COF-29.

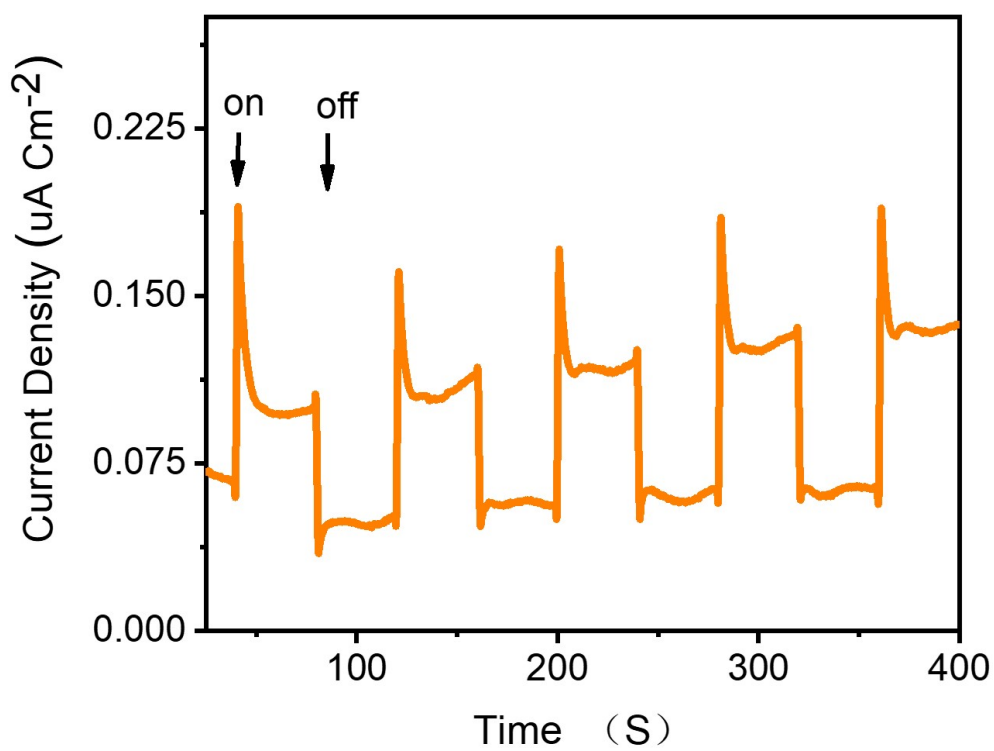

**Fig. S3** Transient photocurrent response.

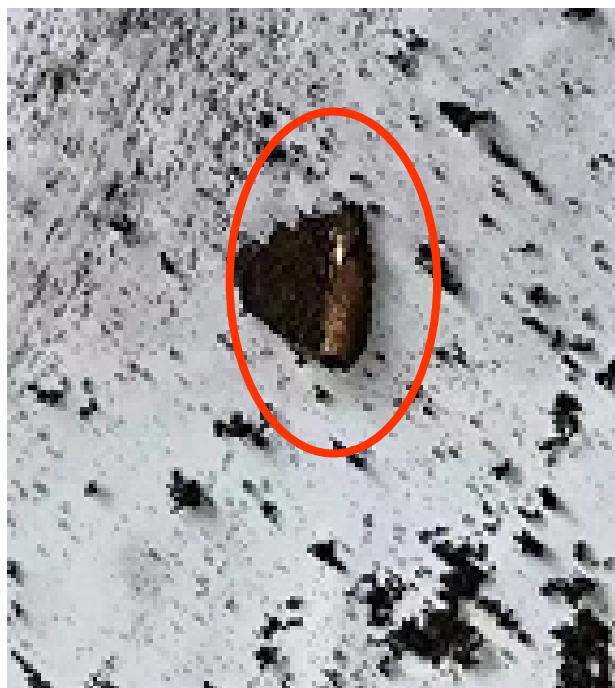

Fig. S4 Gold fragments in the sample after photocatalysis.

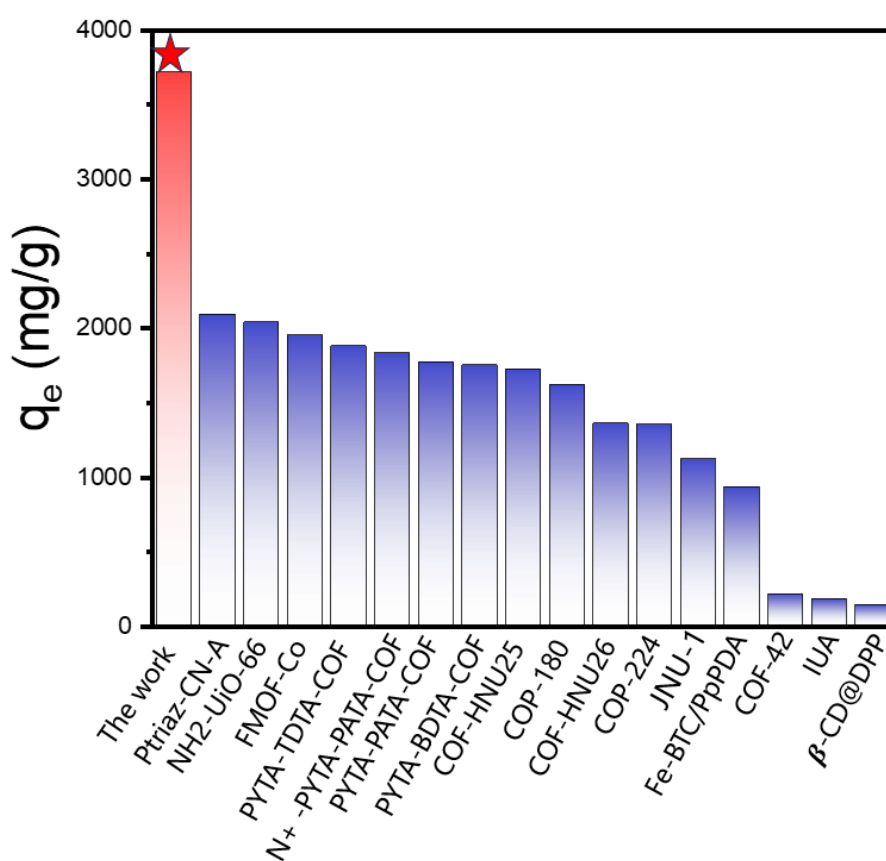

Fig. S5 A comparison in gold uptake capacity among reported adsorbents and our case.

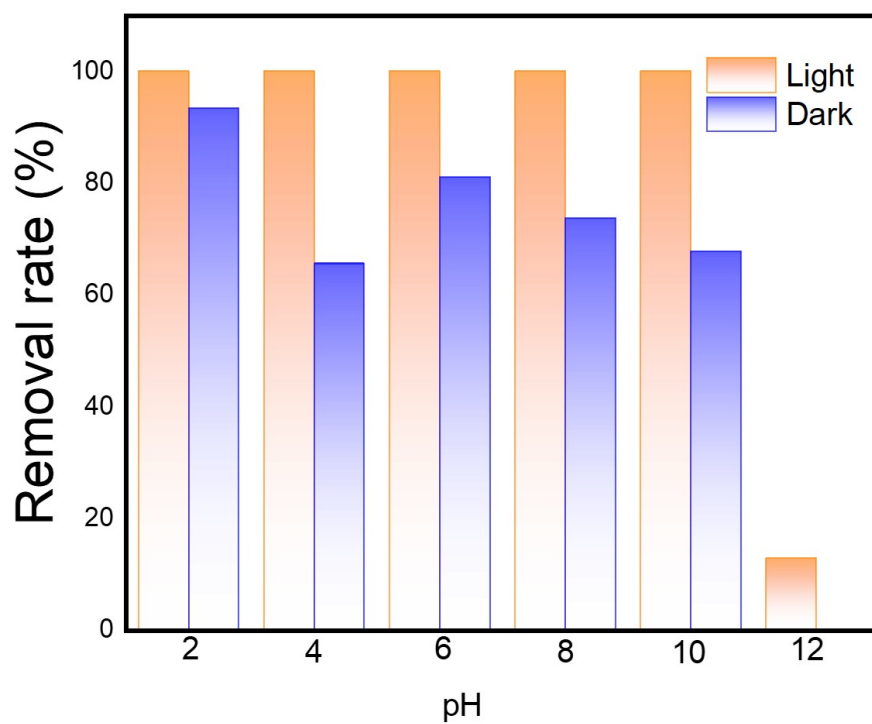

**Fig. S6** Reduction rate of gold at different pH.

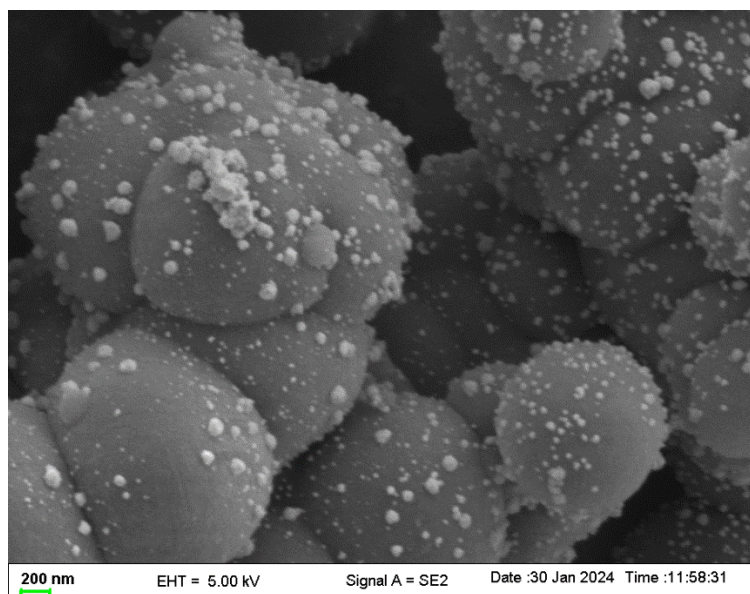

**Fig. S7** The SEM-EDS images of samples after photocatalysis.

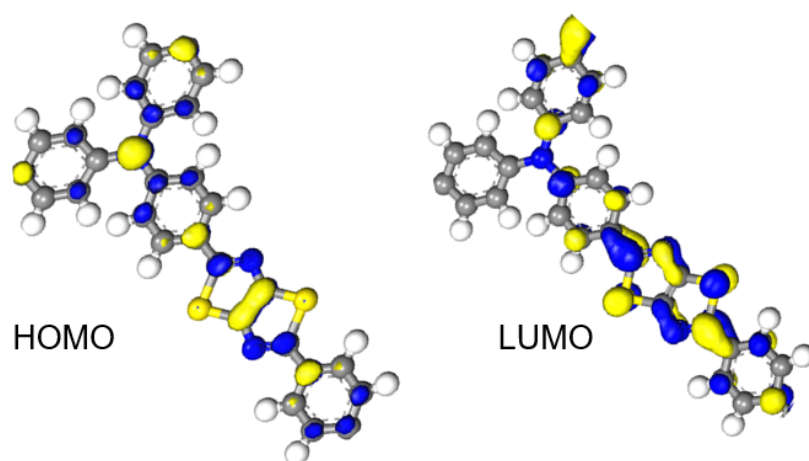

**Fig. S8** HOMO and LUMO of ECUT-COF-29.
